# Supplementary material for: miR-322 stabilizes MEK1 expression to inhibit RAF/MEK/ERK pathway activation in cartilage
Source: Oxford University Press journal article supplement (doi:10.1242/dev.148429), 2017-01-01
Supplement: dev148429supp.pdf [file dev148429supp.pdf]

## Supplementary information

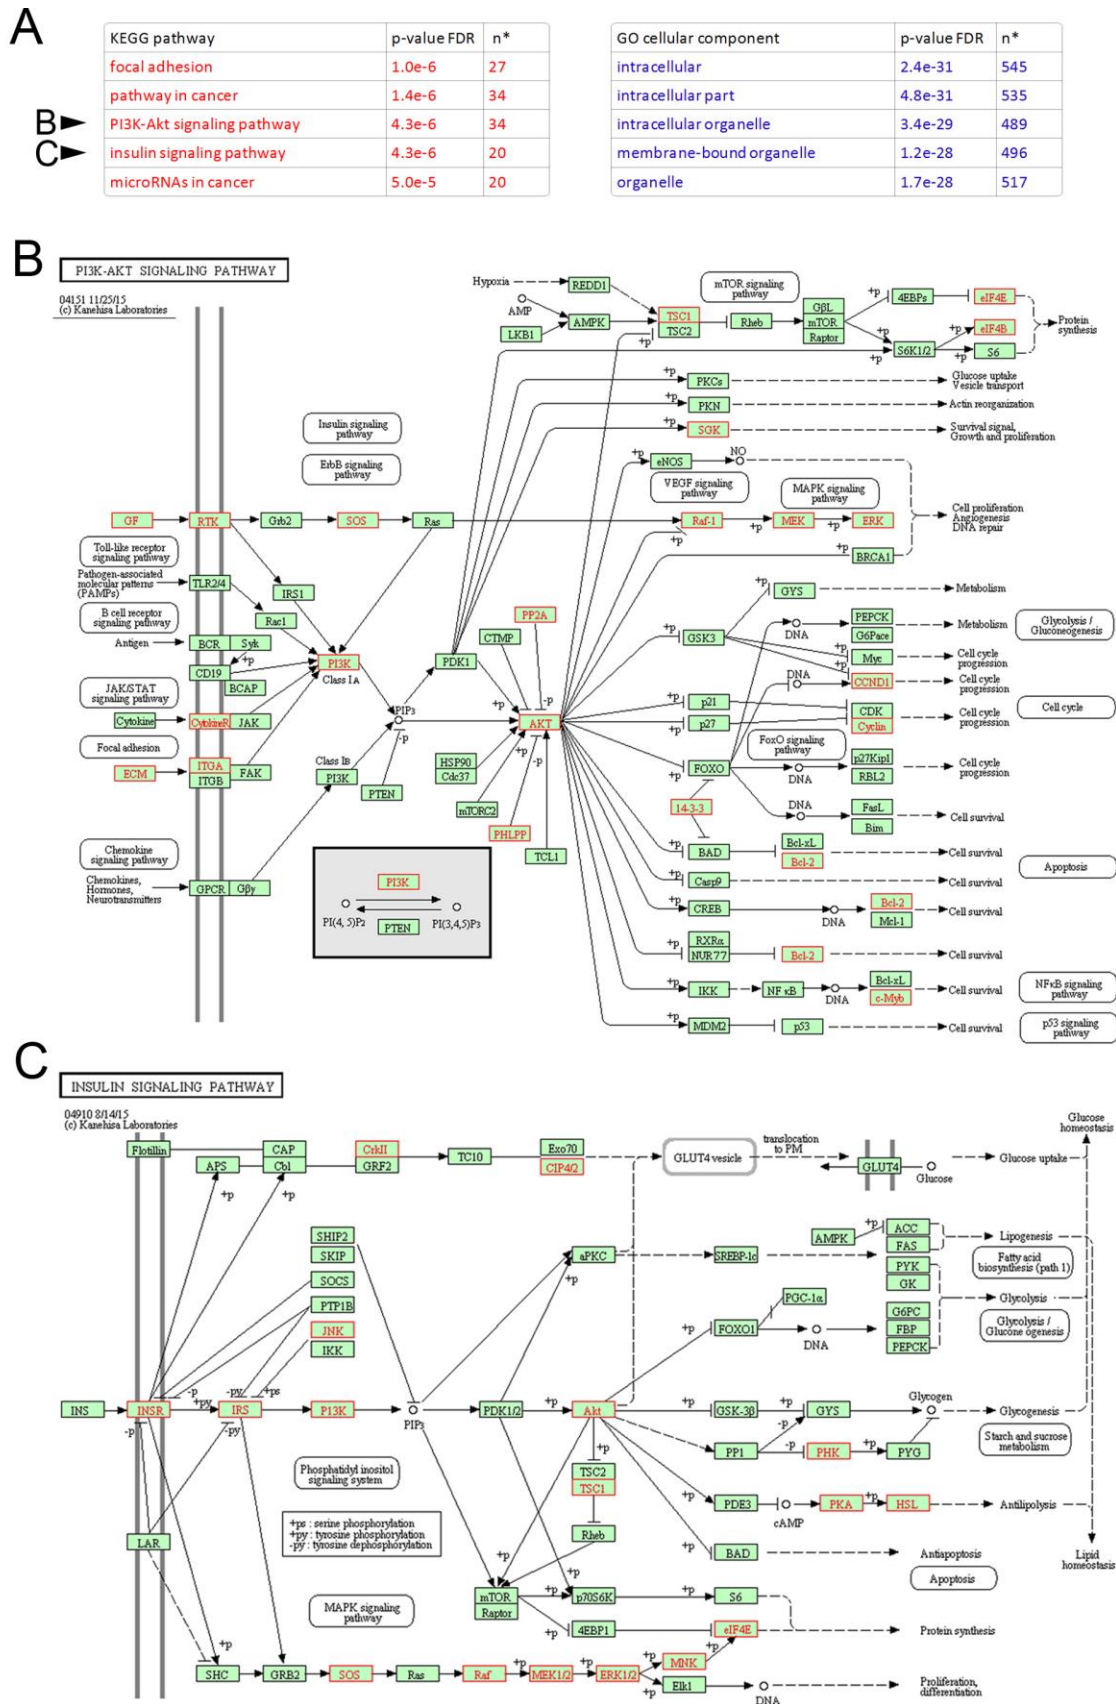

### **Supplemental figure 1**

#### **KEGG and GO cellular component analysis of miR-322 target genes expressed in growth plate cartilage**

(A) String database analysis of expressed target genes (Szklarczyk et al., 2015). The highest ranked KEGG pathway and GO cellular component terms are shown. Significance and entity numbers are given. (B) Illustration of the PI3K-AKT and (C) insulin signaling pathway according to KEGG(Kanehisa et al., 2015). Predicted targets are labeled (red).

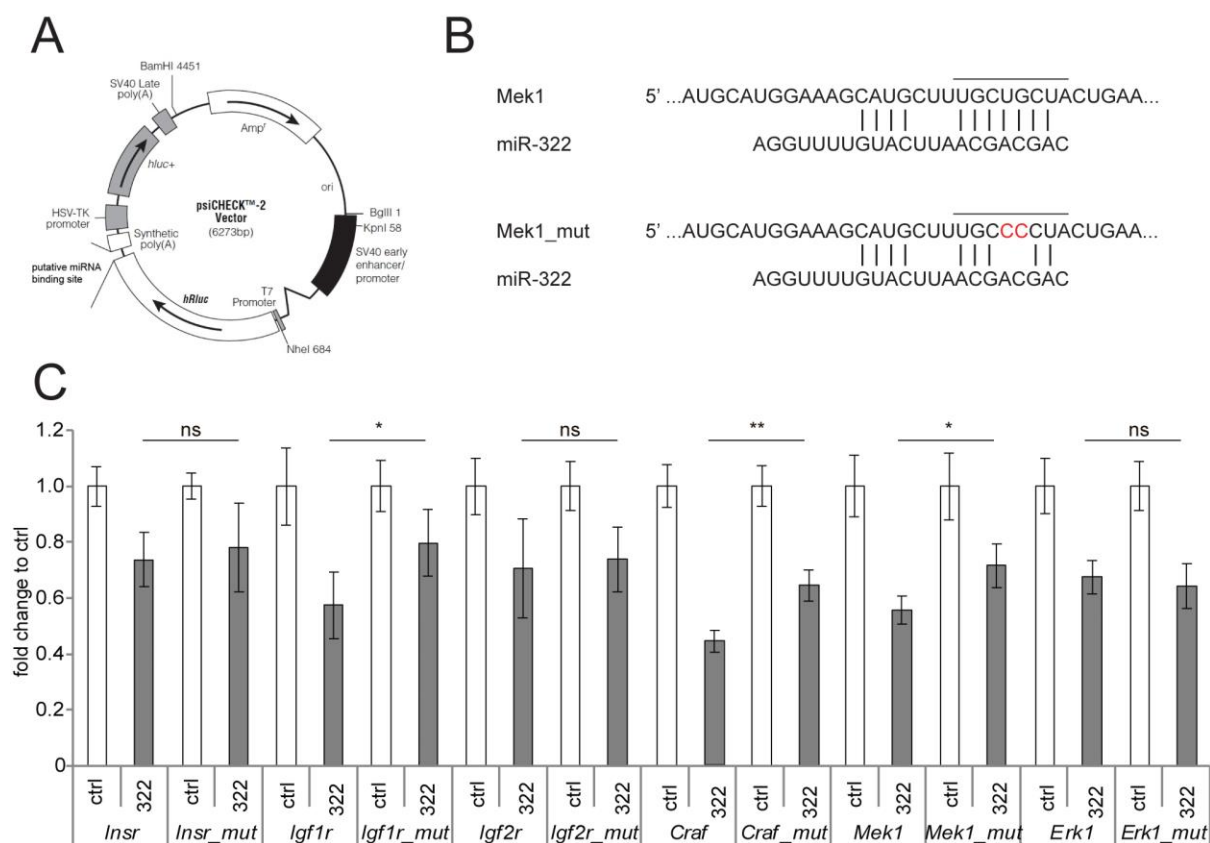

**D**

| Primer        | Sequence (5'-3')                                     |
|---------------|------------------------------------------------------|
| Insr fw       | cgcCCTCAAATTGACCAATAGCTGCTGCTTTCATAgc                |
| Insr rev      | ggccgcTATGAAAGCAGCAGCTATTGGTCAATTTGAGGgcgat          |
| Insr_mut fw   | cgcCCTCAAATTGACCAATAGCTGC <b>AA</b> CTTTCATAgc       |
| Insr_mut rev  | ggccgcTATGAAAG <b>TT</b> GCAGCTATTGGTCAATTTGAGGgcgat |
| Igf1r fw      | cgcATCTGTACAGGAAAAGAAAAGCTGCTATTTTTg                 |
| Igf1r rev     | ggccgcAAAATAGCAGCTTTTCTTTTCTGTACAGATgcgat            |
| Igf1r_mut fw  | cgcATCTGTACAGGAAAAGAAAAGC <b>CA</b> CTATTTTTg        |
| Igf1r_mut rev | ggccgcAAAATAG <b>TG</b> GCTTTTCTTTTCTGTACAGATgcgat   |
| Igf2r fw      | cgcTGTGTTTGAAAAAAACCCTTGCTGCTTTAGACg                 |
| Igf2r rev     | ggccgcGTCTAAAGCAGCAAGGGTTTTTTTCAAACACAgcgat          |
| Igf2r_mut fw  | cgcTGTGTTTGAAAAAAACCCTT <b>ACTA</b> CTTTAGACg        |
| Igf2r_mut rev | ggccgcGTCTAAAG <b>TAGT</b> AAGGGTTTTTTTCAAACACAgcgat |
| Craf fw       | tcgagATGTTTTTGAAAAGCTGCTGCTGCTAAGGACg                |
| Craf rev      | ggccgcGTCTTAGCAGCAGCAGCTTTTCCAAAAACATc               |
| Craf_mut fw   | tcgagATGTTTTTGAAAAGCTGCTGCTGCT <b>CC</b> CTAAGGACg   |
| Craf_mut rev  | ggccgcGTCTTAG <b>GG</b> GCAGCAGCTTTTCCAAAAACATc      |
| Mek1 fw       | tcgagATGCATGGAAAGCATGCTTTGCTGCTACTGAAg               |
| Mek1 rev      | ggccgcTTCAGTAGCAGCAAAGCATGCTTTCCATGCATc              |
| Mek1_mut fw   | tcgagATGCATGGAAAGCATGCTTTGCTGCT <b>CC</b> CTACTGAAg  |
| Mek1_mut rev  | ggccgcTTCAGTAG <b>GG</b> GCAAAGCATGCTTTCCATGCATc     |
| Erk1 fw       | tcgagCTGCCACATGTAACGCCCTTGCTGCTTCTGTGg               |
| Erk1 rev      | ggccgcCACAGAAGCAGCAAGGGCGTTACATGTGGCAGc              |
| Erk1_mut fw   | tcgagCTGCCACATGTAACGCCCTTGCTGCT <b>CC</b> CTTCTGTGg  |
| Erk1_mut rev  | ggccgcCACAGAAG <b>GG</b> GCAAAGGGCGTTACATGTGGCAGc    |

## Supplemental figure 2

### Luciferase miRNA:mRNA interaction assays

(A) Vector map of the psiCHECK2 Vector including the coding sequence of Renilla luciferase (hRluc), the multiple cloning site and the Firefly luciferase (hluc). (B) Illustration of the miR-322 and miR-322\_mut interaction with the predicted binding sequence in the 3'-UTR of Mek1. (C) Fold changes of Renilla to Firefly luciferase activity in miR-322 mimic-transfected HEK293 cells compared to control are presented ( $n \geq 3$ ) and control values with standard deviations are given (not shown in the Figure 2B due to space limitations). (D) Oligonucleotides used for the generation of luciferase reporter constructs containing the putative or mutated (red) miR-322 binding site are listed.

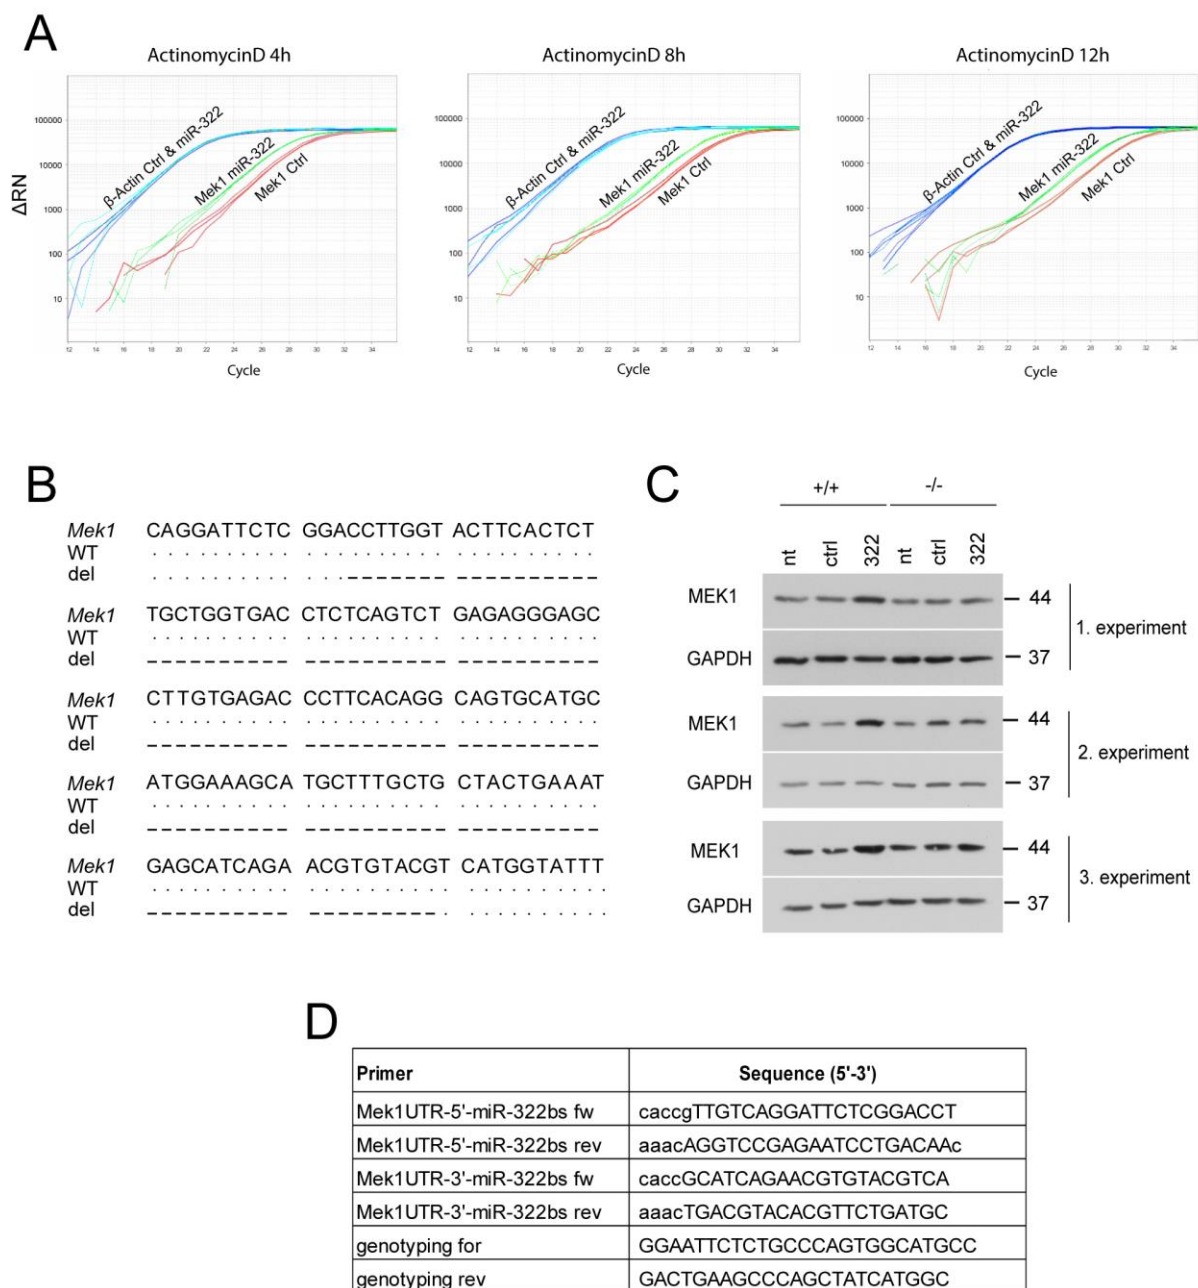

### Supplemental figure 3

#### qPCR analysis of mir-322 expression in actinomycin D treated mimic transfected chondrocytes

(A) Ct-plots of qPCR analysis for  $\beta$ -Actin (blue), Mek1 expression in control-(red) and miR-322 mimic-transfected (green) PECs four, eight and 12 hours after blocking transcription with actinomycin D. (B) The wild type sequence in the 3'UTR of *Mek1* is shown and the targeted sequence is marked (del, -) (C) Immunoblot analysis of total MEK1 and GAPDH levels in control and miR-322 mimic transfected ATDC5 cells containing the wild type (+/+) or biallelic deletion (-/-) of the miR-322 binding site in the 3'-UTR of *Mek1*. Three independent transfection experiments are shown. (D) Oligonucleotides used for CRISPR/Cas-mediated genomic manipulation and PCR-based genotyping are listed.



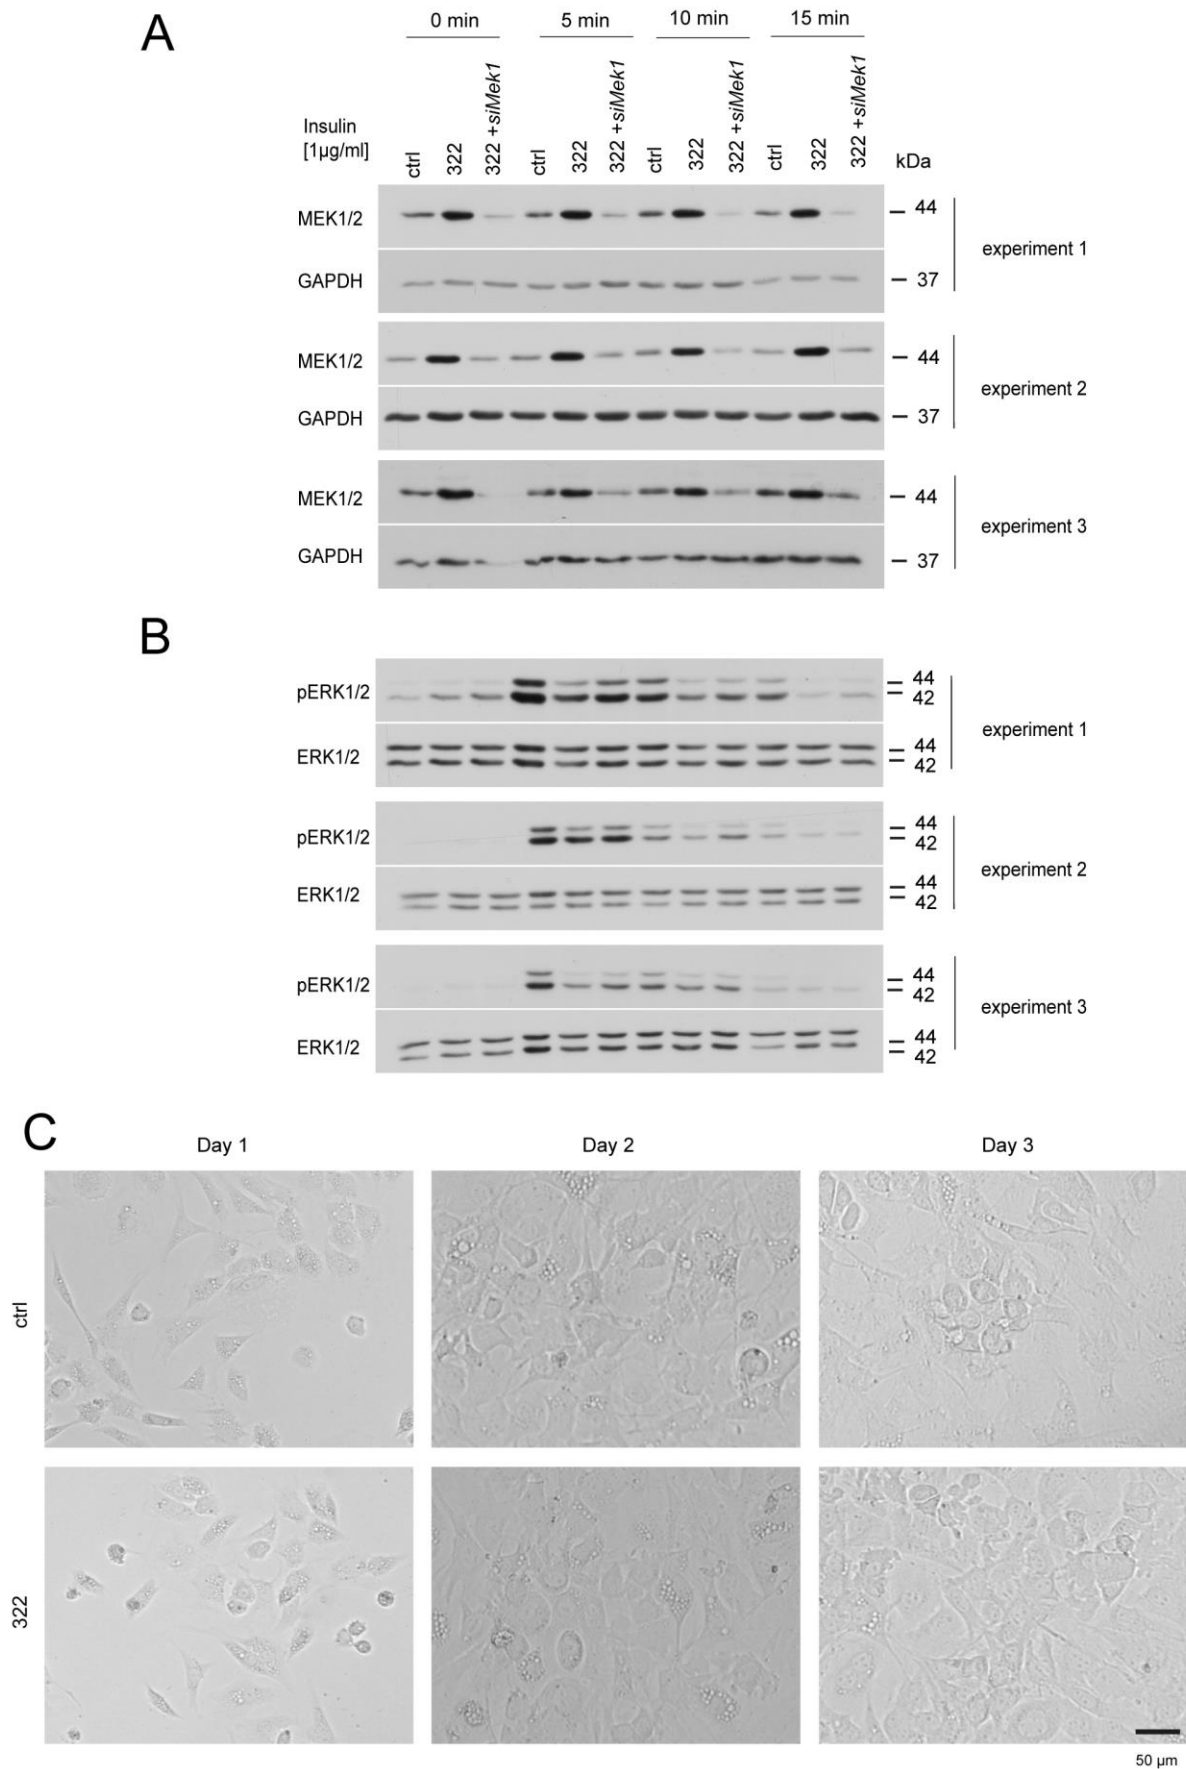

#### **Supplemental figure 4**

#### **Reduction of MEK1 protein levels and stimulation of RAF/MEK/ERK pathway activation ERK in miR-322 mimic-transfected chondrocytes using Mek1-specific siRNA**

Immunoblots showing (A) total MEK1/2 and GAPDH or (B) pERK1/2 and total ERK1/2 (lower panel) in control-, miR-322 mimic- and miR-322 mimic/MEK1-siRNA-transfected PECs of three independent experiments. (C) Representative images of control- and miR-322 mimic-transfected PEC are shown for one, two and three days after transfection. No significant differences between control- and miR-322 mimic-transfected PEC were observed. Bar: (C) 50µm

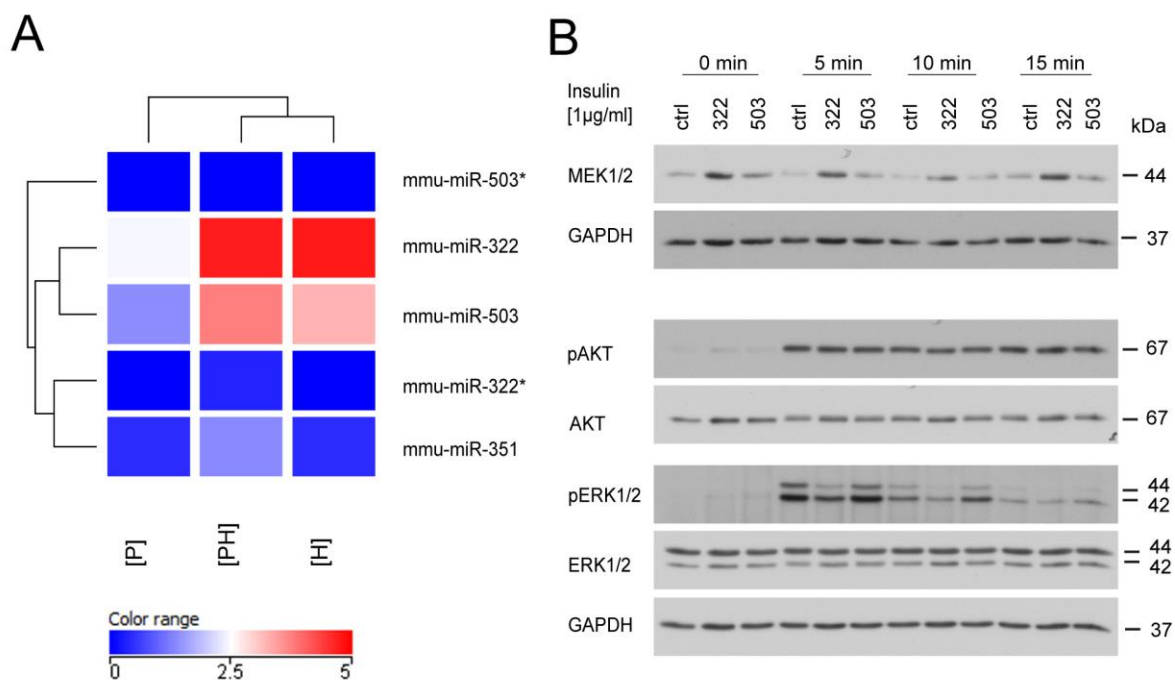

**Supplemental figure 5**

(A) Intensity plots of miR-322-cluster specific miRNA expression. High (red) and low (blue) expression values are indicated. (B) Representative immunoblot analysis of pMEK1/2, total MEK1/2, pERK1/2, total ERK1/2, pAKT, total AKT and GAPDH in protein levels in control-, miR-322 mimic- or miR-503 mimic- transfected primary epiphyseal chondrocytes.



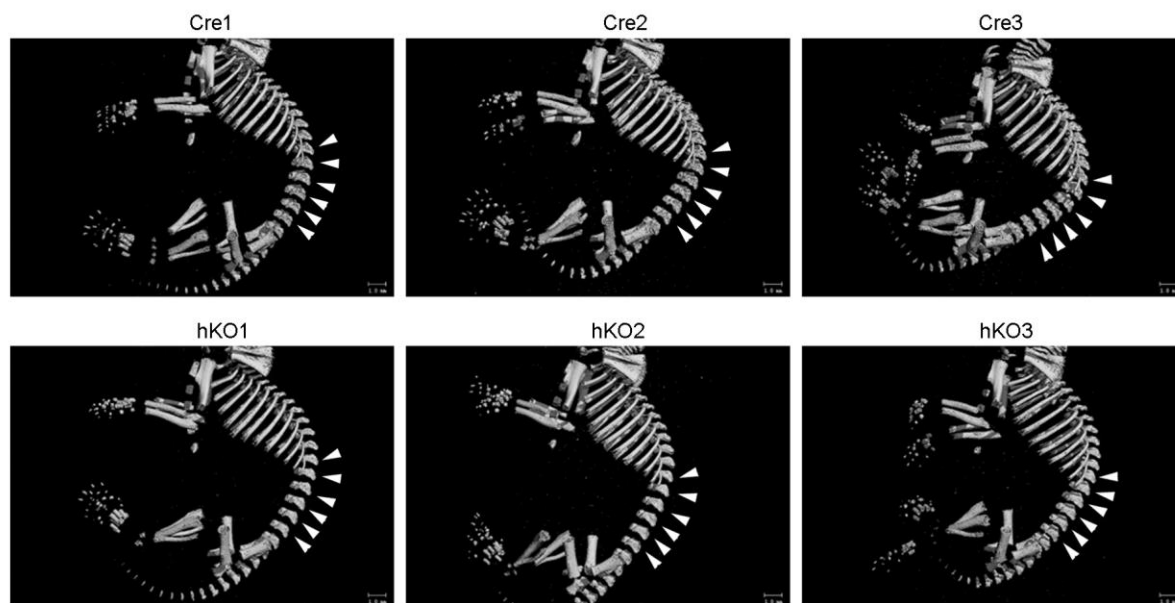

### Supplemental figure 6

#### Visualization of the skeleton in newborns

Bony elements in newborn *Col2a1-Cre* (Cre) and *Col2a1-Cre-Mirc24<sup>tm1M</sup>* (hKO) males (n=3 per genotype) were detected by  $\mu$ CT analysis. Three dimensional reconstructions are shown and the vertebral bodies are marked (arrowhead) and point to differences between the genotypes. Bars: 1mm.

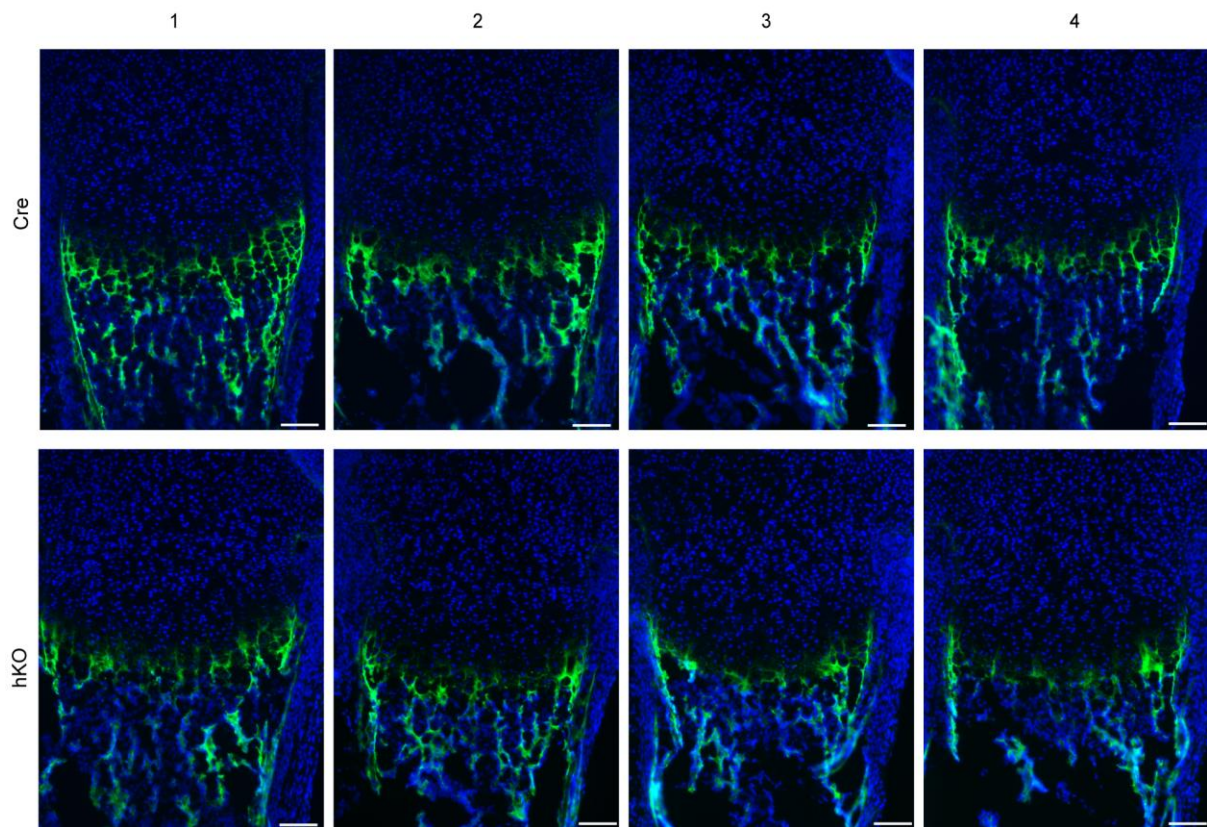

### Supplemental figure 7

#### Characterization of the hypertrophic growth plate cartilage in newborns

Collagen X protein was detected by immunostaining (green) in the newborn growth plate cartilage of *Col2a1-Cre* (Cre) and *Col2a1-Cre-Mirc24<sup>tm1M</sup>* (hKO) males (n=4 per genotype). Nuclei were stained with DAPI (blue). Bar: 100 $\mu$ m
